# Supplementary material for: Genetic assessment of three Fagaceae species in forest restoration trials
Source: PeerJ. 2019 May 28;7:e6958. doi: 10.7717/peerj.6958 (PMC6544010; doi:10.7717/peerj.6958)
Supplement: Table S3 [file peerj-07-6958-s003.xlsx]

## Sheet: Sheet1
Species	Candidate parent	Progeny assignment
L. polystachyus	-	-
C. tribuloides	CT012	CT013, CT014, CT015, CT016, CT017
	CT018	CT019, CT020, CT021, CT022, CT023
	CT024	CT025, CT026, CT027, CT028, CT029
C. calathiformis	CC007	CC008, CC009, CC010, CC011, CC012
	CC013	CC014, CC015, CC016, CC017, CC018
	CC019	CC020, CC021, CC022, CC023, CC024
	CC043	CC044, CC045, CC046, CC047, CC048
	CC050	CC051, CC052, CC053, CC054
	CC055	CC056, CC057, CC058, CC059
	CC072	CC073, CC074, CC075, CC076, CC077, CC096, CC097, CC098, CC099, CC100, CC101, CC102, CC103, CC104, CC105, CC106, CC107, CC108, CC109, CC110, CC111, CC112, CC113, CC114, CC115, CC116, CC117, CC118, CC119, CC120, CC121, CC122, CC123, CC124, CC125, CC126, CC127, CC128, CC129, CC130, CC131, CC132, CC133, CC134, CC135
	CC078	CC079, CC080, CC081, CC082, CC083
	CC084	CC085, CC086, CC087, CC088, CC089
